# Supplementary material
Source: publisher site journal article supplement (https://www.dovepress.com/article/523476)
Supplement: Supplementary file 1 [file 523476%20%20Supplementary%20Material.docx]

**Supplementary material**

**Supplementary figures**

**Supplementary Figure 1: Flowchart of patient inclusion and exclusion.** Abbreviations: HNCH, Hainan Cancer hospital; GZMUF3, The Third Affiliated Hospital, Guangzhou Medical University; JNF1, The First Affiliated Hospital of Jinan University; GDPPH, Guangdong Provincial People's Hospital; uHCC, unresectable hepatocellular carcinoma; ICIs, immune checkpoint inhibitors; TKIs, tyrosine-kinase inhibitors; ECOG PS, Eastern Cooperative Oncology Group performance status.


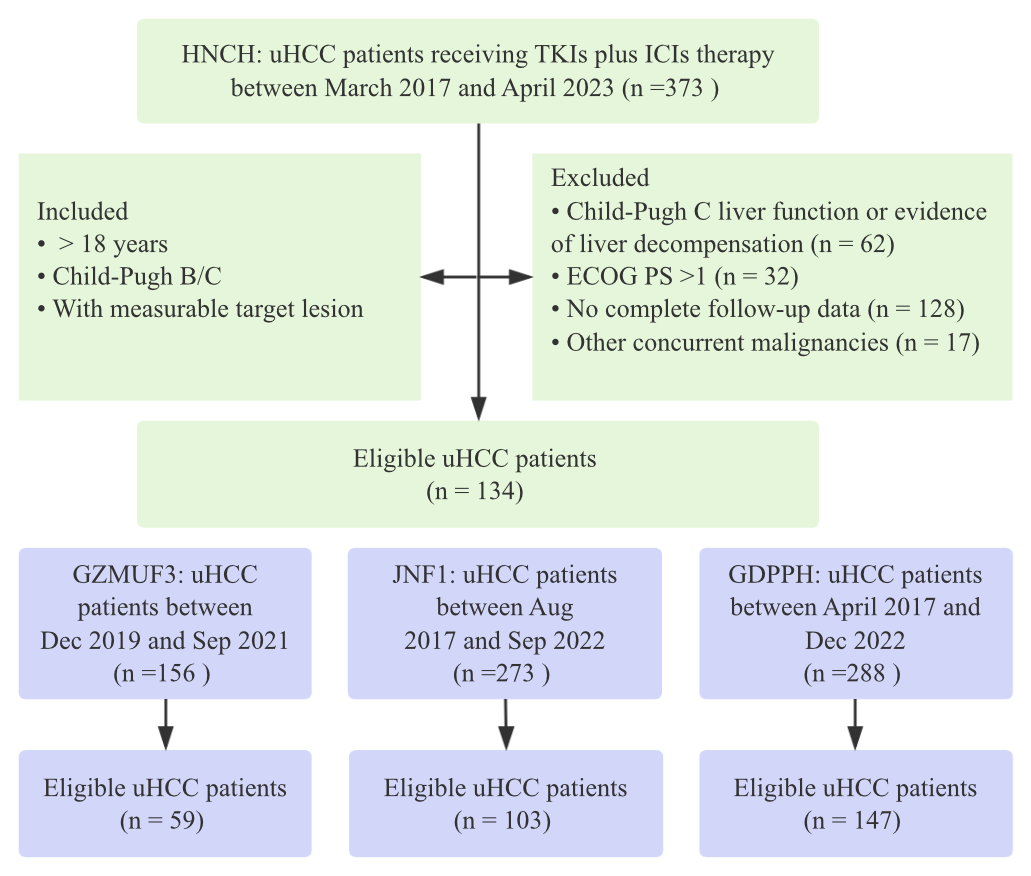


**Supplementary Figure 2:** Heatmap illustrating the correlations among the remaining variables after univariate and multivariate logistic regression analyses. Abbreviations: BLCL, Barcelona Clinic Liver Cancer; LNM, lymph node metastasis; pre-TKI therapy, TKI therapy before combination therapy; pre-antiviral therapy, antiviral therapy before combination therapy.


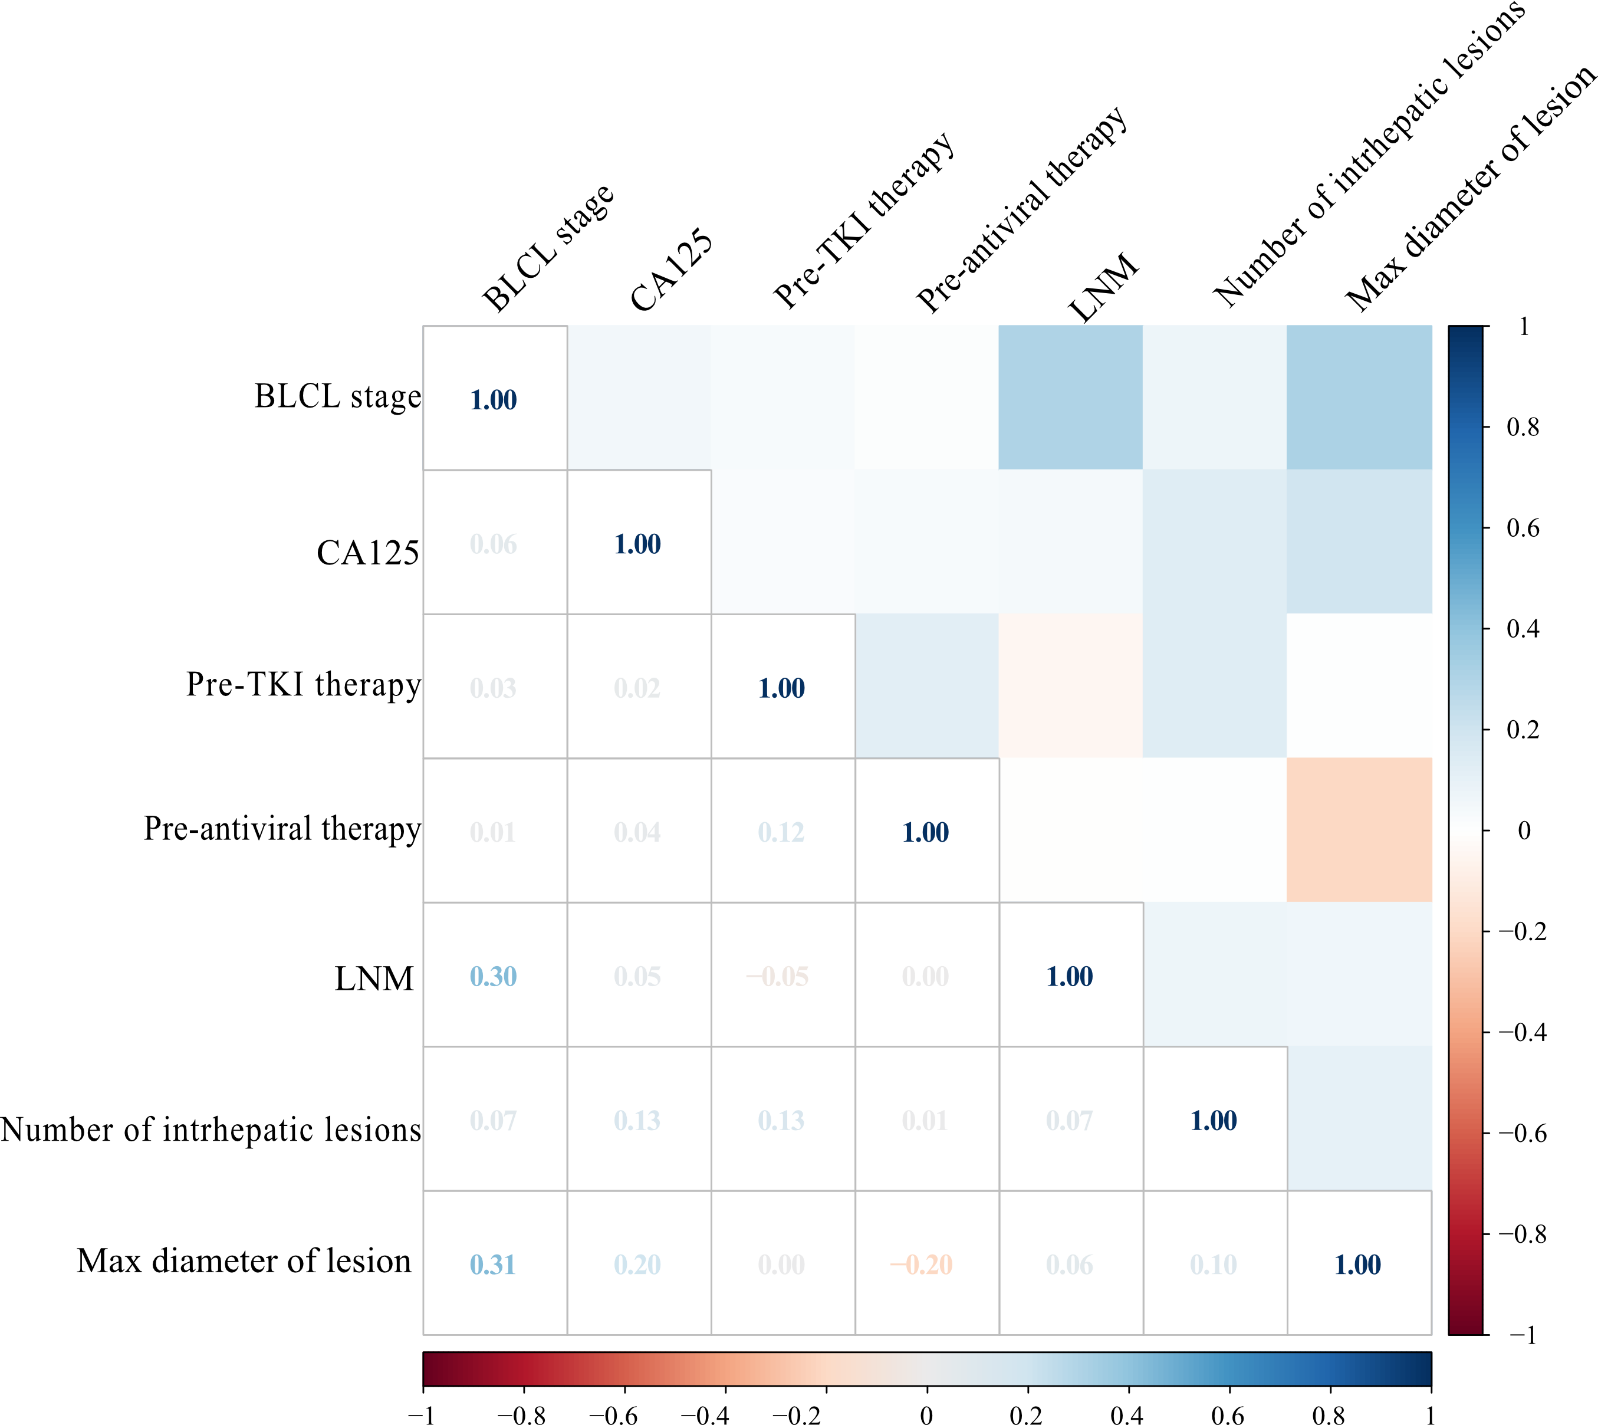


**Supplementary Figure 3:** (A) Learning curve of the GBM-based combined model in the training cohort. (B) Five-fold cross-validation performance of the GBM-based combined model in the training cohort. Abbreviations: GBM, Gradient Boosting Machine; AUC, area under the curve; ACC, accuracy; SEN, sensitivity; SPE, specificity.


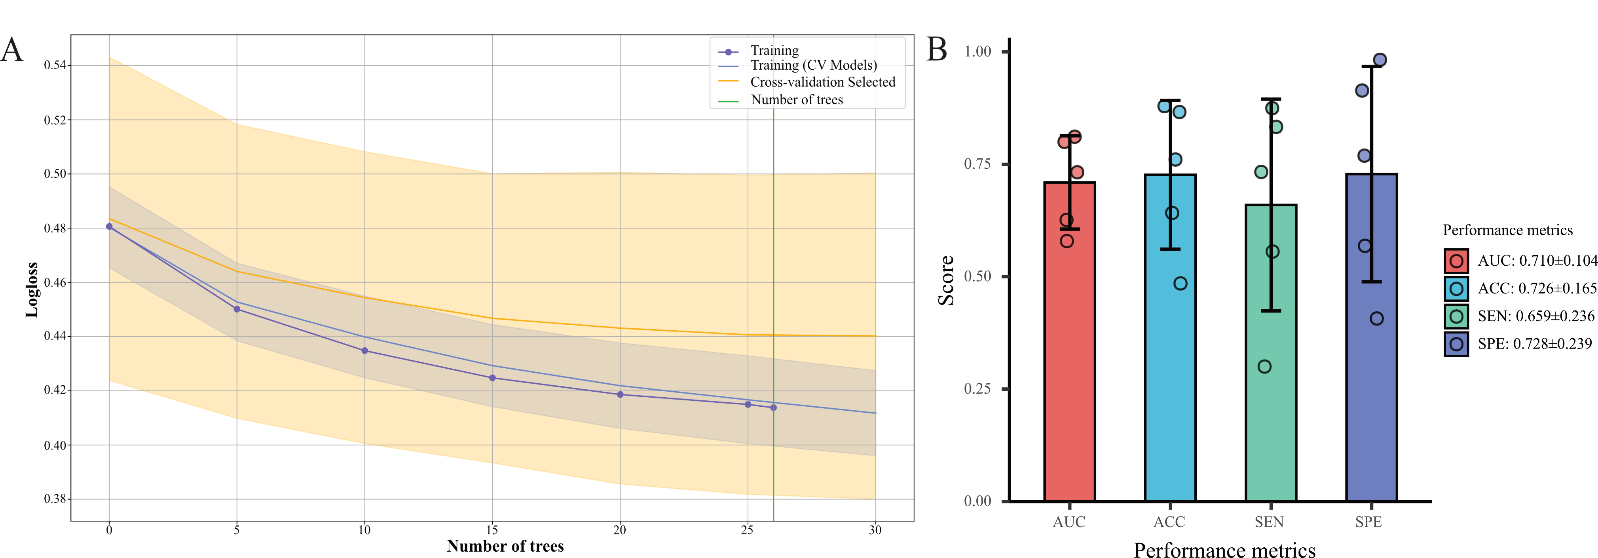


**Supplementary Figure 4:** Partial Dependence (PD) plot Partial dependence plot (PDP) provides a graphical depiction of the marginal effect of a variable on the response. The effect of a variable was measured as the change in mean response. The PDP assumes independence between the feature for which the PDP is computed and the rest.


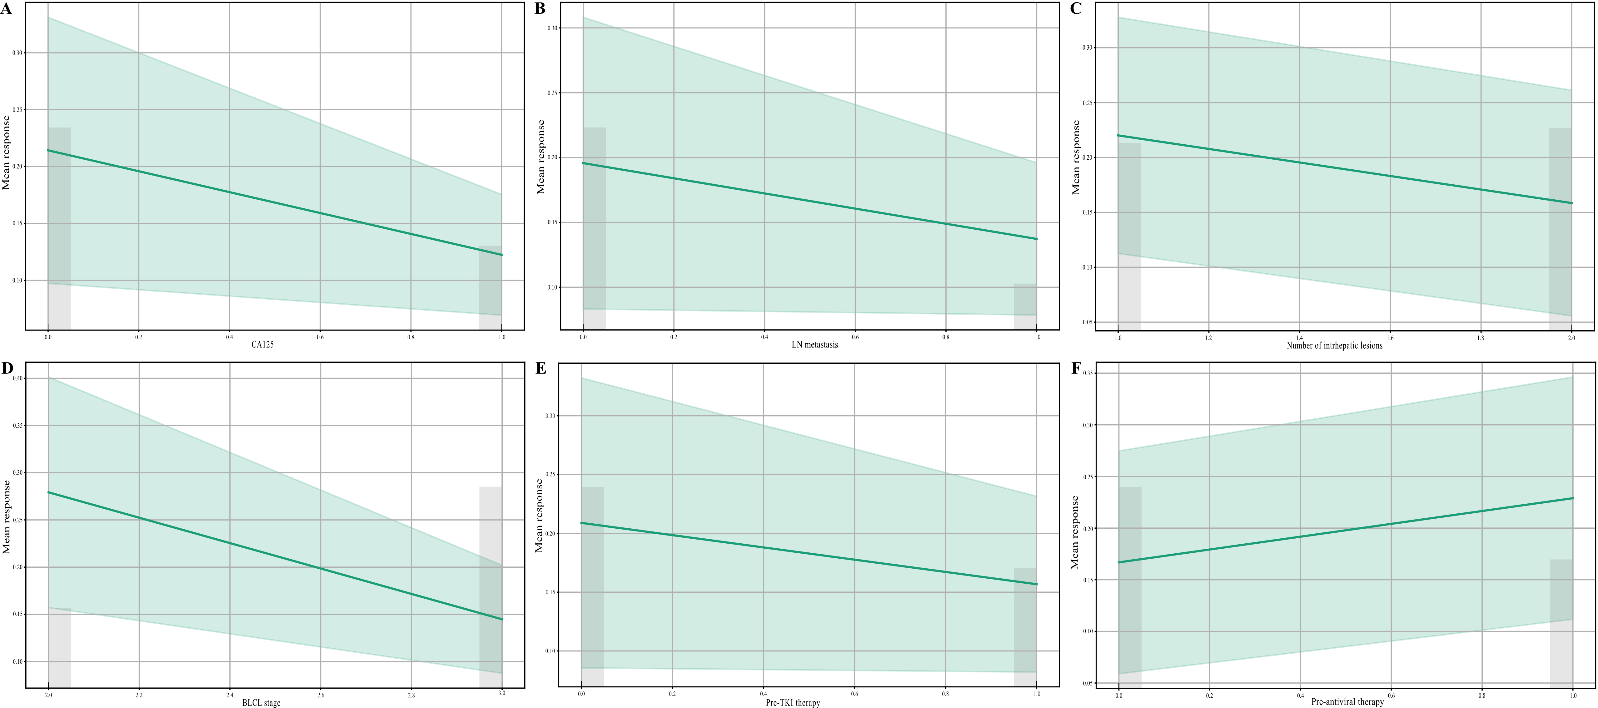


**Supplementary table**

**Supplementary Table 1:** Propensity score-matched baseline characteristics of HCC patients treated with surgical resection or ablation therapies

| **Variable** | **Overall** | **Ablation** | **Resection** | **P-value** |
| --- | --- | --- | --- | --- |
|  | **n= 52** | **n = 26** | **n = 26** |  |
| Age (year) | 55 (50-65) | 54 (50-65) | 56 (50-63) | 0.91 |
| Sex (male) | 44 (84.6) | 21 (80.8) | 23 (88.5) | 0.70 |
| Alcohol | 7 (13.5) | 2 (7.7) | 5 (19.2) | 0.42 |
| Smoke | 11 (21.2) | 3 (11.5) | 8 (30.8) | 0.09 |
| Diabetes | 2 (3.85) | 2 (7.69) | 0 (0) | 0.49 |
| Hypertension | 13 (25.0) | 3 (11.5) | 10 (38.5) | 0.03 |
| Other medical history | 5 (9.62) | 4 (15.4) | 1 (3.85) | 0.35 |
| Child-Pugh stage |  |  |  | >0.99 |
| A | 42 (80.8) | 21 (80.8) | 21 (80.8) |  |
| B | 10 (19.2) | 5 (19.2) | 5 (19.2) |  |
| BLCL stage |  |  |  | 0.09 |
| B | 28 (53.8) | 11 (42.3) | 17 (65.4) |  |
| C | 24 (46.2) | 15 (57.7) | 9 (34.6) |  |
| ECOG PS |  |  |  | 0.02 |
| 0 | 32 (61.5) | 12 (46.2) | 20 (76.9) |  |
| 1 | 20 (38.5) | 14 (53.8) | 6 (23.1) |  |
| HBV DNA (copies/mL) |  |  |  | 0.16 |
| ≤2000 | 31 (59.6) | 19 (73.1) | 12 (46.2) |  |
| 2000-20000 | 5 (9.62) | 2 (7.7) | 3 (11.5) |  |
| >20000 | 16 (30.8) | 5 (19.2) | 11 (42.3) |  |
| HBV | 52 (100.0) | 26 (100.0) | 26 (100.0) | >0.99 |
| WBC (109/L) | 10.63±25.79 | 4.68±1.46 | 16.58±35.79 | 0.004 |
| RBC (1012/L) | 4.45±0.84 | 4.28±0.82 | 4.62±0.85 | 0.15 |
| Neutrophil (109/L) | 3.34±1.86 | 2.89±1.25 | 3.80±2.25 | 0.13 |
| Lymphocyte (109/L) | 1.40±0.72 | 1.13±0.58 | 1.66 ±0.75 | 0.003 |
| PLT (109/L) | 174.37±82.76 | 171.27±80.53 | 177.47±86.41 | 0.40 |
| Hb (g/L) | 129.19±24.19 | 120.50±23.59 | 137.89±21.92 | 0.01 |
| Prothrombin time (s) | 13.83±1.37 | 13.79±1.40 | 13.87±1.37 | 0.86 |
| ALB (g/L) | 37.01±6.37 | 35.03±6.10 | 38.99±6.12 | 0.02 |
| ALP (U/L) | 128.94±88.16 | 141.97±85.72 | 115.90±90.30 | 0.15 |
| AST (U/L) | 111.02±387.80 | 44.69±37.07 | 177.35±544.31 | 0.01 |
| ALT (U/L) | 155.49±808.51 | 36.74±25.20 | 274.24±1,141.74 | 0.07 |
| TBIL (μmol/L) | 17.99±22.52 | 13.73±9.94 | 22.24±29.98 | 0.17 |
| TP (g/L) | 122.48±72.71 | 130.04±73.77 | 114.92±72.28 | 0.46 |
| LDH (U/L) | 254.22±207.60 | 246.61±195.49 | 261.84±222.66 | 0.42 |
| γ-GT (U/L) | 131.99±112.53 | 127.61±105.79 | 136.37±120.83 | 0.92 |
| ALBI |  |  |  | >0.99 |
| 1 | 18 | 9 | 9 |  |
| 2 | 32 | 16 | 16 |  |
| 3 | 2 | 1 | 1 |  |
| AFP (>400ng/dl) | 16 (30.8) | 8 (30.8) | 8 (30.8) | >0.99 |
| CA125 (>35U/mL) | 7 (13.5) | 6 (23.1) | 1 (3.9) | 0.09 |
| CA199 (>37U/mL) | 37 (71.2) | 20 (76.9) | 17 (65.4) | 0.36 |
| CEA (ng/mL) | 4.60±12.40 | 2.71±1.91 | 6.49±17.40 | 0.34 |
| Number lesions |  |  |  | 0.25 |
| <3 | 35 (67.3) | 15 (57.7) | 20 (76.9) |  |
| ≥3 | 17 (32.7) | 11 (42.3) | 6 (23.1) |  |
| Max diameter of lesion (cm) | 7.73±4.88 | 7.83±5.55 | 7.63±4.21 | 0.84 |
| Cirrhosis | 36 (69.2) | 21 (80.8) | 15 (57.7) | 0.07 |
| Esophageal Gastric varices | 24 (46.2) | 16 (61.5) | 8 (30.8) | 0.03 |
| PVTT | 18 (34.6) | 10 (38.5) | 8 (30.8) | 0.56 |
| Ascites | 13 (25.0) | 11 (42.3) | 2 (7.7) | 0.004 |
| Distant metastasis | 12 (23.1) | 10 (38.5) | 2 (7.7) | 0.008 |
| LN metastasis | 2 (3.9) | 1 (3.85) | 1 (3.9) | >0.99 |
| Lung metastasis | 9 (17.3) | 8 (30.8) | 1 (3.9) | 0.02 |
| Bone metastasis | 1 (1.9) | 1 (3.9) | 0 (0) | >0.99 |
| Other metastasis | 3 (5.8) | 3 (11.5) | 0 (0) | 0.24 |
| Imaging-based features |  |  |  |  |
| Intratumoral artery | 42 (80.8) | 19 (73.1) | 23 (88.5) | 0.16 |
| Irregular margin | 27 (51.9) | 14 (53.8) | 13 (50.0) | 0.78 |
| Tumoral capsule | 28 (53.8) | 14 (53.8) | 14 (53.8) | >0.99 |
| Peritumoral enhancement | 13 (25.0) | 5 (19.2) | 8 (30.8) | 0.34 |
| Intratumoral bleeding | 5 (9.62) | 1 (3.9) | 4 (15.4) | 0.35 |
| Pre-combination therapy |  |  |  |  |
| Targeted therapy | 14 (26.9) | 7 (26.9) | 7 (26.9) | >0.99 |
| Antiviral therapy | 25 (48.1) | 16 (61.5) | 9 (34.6) | 0.05 |
| TACE therapy | 14 (26.9) | 8 (30.8) | 6 (23.1) | 0.53 |
| Surgical therapy | 8 (15.4) | 4 (15.4) | 4 (15.4) | >0.99 |
| Ablation therapy | 9 (17.3) | 7 (26.9) | 2 (7.7) | 0.14 |
| Perfusion therapy | 2 (3.9) | 1 (3.9) | 1 (3.9) | >0.99 |
| Radiotherapy | 0 | 0 | 0 | / |
| Combination therapy |  |  |  |  |
| TACE therapy | 16 (30.8) | 8 (30.8) | 8 (30.8) | >0.99 |
| Perfusion therapy | 15 (28.8) | 13 (50.0) | 2 (7.7) | <0.001 |
| Radiotherapy | 5 (9.6) | 4 (15.4) | 1 (3.9) | 0.35 |

Note: Qualitative variables are in n (%) and quantitative variables are in median (interquartile range, IQR), when appropriate. uHCC, unresectable hepatocellular carcinoma; BLCL, Barcelona Clinic Liver Cancer; ECOG PS, Eastern Cooperative Oncology Group performance status; HBV, hepatitis B virus; HCV, hepatitis C virus; WBC, white blood cell; RBC, red blood cell; PLT, blood platelet count; Hb, haemoglobin level; ALB, albumin; ALP, alkaline phosphatase; AST, aspartate transaminase; ALT, alanine aminotransferase; TBIL, total bilirubin; TP, total protein; LDH, lactate dehydrogenase; γ-GT, gamma-glutamyl transferase; ALBI, albumin–bilirubin; AFP, alpha-fetoprotein; CEA, carcinoembryonic antigen; PVTT, portal vein tumor thrombus; LN, lymph node; TACE, transcatheter arterial chemoembolization; TKIs, tyrosine kinase inhibitors; PD-1/PD-L1 antibodies, programmed cell death protein 1/programmed cell death ligand 1 antibodies. P ≤ 0.05 was considered to indicate statistical significance.

**Supplementary Table 2:** Summary of balance for propensity score matching data

|  | **Match factors** | **Means Treated** | **Means Control** | **Std. Mean Diff.** | **Var. Ratio** | **eCDF Mean** | **eCDF Max** | **Std. Pair Dist.** |
| --- | --- | --- | --- | --- | --- | --- | --- | --- |
| All Data (n=84) | Distance | 0.58 | 0.46 | 0.74 | 0.98 | 0.18 | 0.34 | \ |
| LNM | 0.07 | 0.10 | -0.13 | . | 0.03 | 0.03 | \ |
| AFP | 0.30 | 0.53 | -0.50 | . | 0.23 | 0.23 | \ |
| Pre-perfusion therapy | 0.09 | 0.08 | 0.06 | . | 0.02 | 0.02 | \ |
| Pre-targeted therapy | 0.23 | 0.33 | -0.23 | . | 0.10 | 0.10 | \ |
| Child-Pugh stage | 1.14 | 1.30 | -0.47 | 0.56 | 0.08 | 0.16 | \ |
| HBV | 0.95 | 1 | -0.22 | . | 0.05 | 0.05 | \ |
| Matched Data (n=52) | Distance | 0.54 | 0.54 | 0 | 1 | 0 | 0 | 0 |
| LNM | 0.04 | 0.04 | 0 | . | 0 | 0 | 0 |
| AFP | 0.31 | 0.31 | 0 | . | 0 | 0 | 0 |
| Pre-perfusion therapy | 0.04 | 0.04 | 0 | . | 0 | 0 | 0 |
| Pre-targeted therapy | 0.27 | 0.27 | 0 | . | 0 | 0 | 0 |
| Child-Pugh stage | 1.19 | 1.19 | 0 | 1 | 0 | 0 | 0 |
| HBV | 1 | 1 | 0 | . | 0 | 0 | 0 |

Note: LNM, lymph node metastasis; AFP, alpha-fetoprotein; pre-TKI therapy, TKI therapy before combination therapy; pre-perfusion therapy, receiving perfusion therapy before combination therapy; HBV, hepatitis B virus.

**Supplementary Table 3:** IDI of models

| **Comparison** | **Improvement (%)** | **P-value** |
| --- | --- | --- |
| **GBM-based combined model** & **GBM model** | 2.6 (-0.4, 5.7) | 0.09 |
| **GBM model** & **BLCL stage** | 6.2 (2.8, 9.6) | <0.001 |
| **GBM-based combined model & BLCL stage** | 8.8 (5.9, 11.8) | <0.001 |

Note: Data in parentheses are 95% CI. IDI, Discrimination Improvement; GBM, Gradient Boosting Machine; BLCL, Barcelona Clinic Liver Cancer.

**Supplementary Table 4:** NRI of models

| **Comparison** | **Events (%)** | **P-value** |
| --- | --- | --- |
| **GBM-based combined model**& **GBM model** | -1.2 (-8.0, 12.6) | 0.69 |
| **GBM model** & **BLCL stage** | 14.3 (-5.2, 24.6) | 0.23 |
| **GBM-based combined model & BLCL stage** | 13.1 (1.2, 22.1) | 0.03 |

Note: Data in parentheses are 95% CI. NRI, Net Reclassification Improvement; GBM, Gradient Boosting Machine; BLCL, Barcelona Clinic Liver Cancer.
